# Supplementary material for: Graphene oxide based DNA nanoswitches as a programmable pH-responsive biosensor
Source: Royal Society of Chemistry journal article supplement (doi:10.1039/c6ay01358a), 2016-01-01

## **Electronic Supplementary Information**

### **Graphene oxide based DNA nanoswitches as a programmable pH-responsive biosensor**

Fengyan Luo, Qiang Xi, Jianhui Jiang \*, Ruqin Yu\*

State Key Laboratory of Chemo/Biosensing and Chemometrics, College of Chemistry  
and Chemical Engineering, Hunan University, Changsha 410082, P. R. China

Tel: 86-731-88822577. Fax: 86-731-88822872

E-mail address: jianhuijiang@hnu.edu.cn; rqyu@hnu.edu.cn.

**Table S1.** Sequences of DNA oligonucleotide

---

| Name                                    | Sequences (5'-3')                                                         |
|-----------------------------------------|---------------------------------------------------------------------------|
| triplex DNA probe <b>1</b><br>(50% TAT) | AAA AAG GGG GTT TAC CCC CTT TTT CTT TGT<br>TTT TCC CCC- TAMAR             |
| triplex DNA probe <b>2</b><br>(80% TAT) | AAG AAA AGA ATT TAT TCT TTT CTT CTT TGT TCT<br>TTT CTT- TAMAR             |
| Control DNA probe <b>1</b>              | CAA CAA GAA AGC CAA ACC GAG ATG GGT TTG<br>GCT TTC TTG TTG GTT GAC- TAMAR |
| Control DNA probe <b>2</b>              | TGT AGC GAG TGT CTT TGG CA- TAMAR                                         |
| Control DNA probe <b>3</b>              | TAMAR- GGT TGG GCG GGA TGG GTG TTT T                                      |

---

**Table S2.** Fluorescence anisotropy of the DNA probe **1** (50% TAT) in different pH conditions

| pH  | Anisotropy | Polarization |
|-----|------------|--------------|
| 5.0 | 0.064665   | 0.09396      |
| 9.0 | 0.168312   | 0.232871     |

**Table S3.** The water sample **1**, sample **2** and sample **3** respectively from Xiang River, Peach Lake and Yuelu Mountain.

| Sample   | Proposed method | pH meter        |
|----------|-----------------|-----------------|
| <b>1</b> | $6.85 \pm 0.12$ | $6.94 \pm 0.01$ |
| <b>2</b> | $6.80 \pm 0.08$ | $6.82 \pm 0.02$ |
| <b>3</b> | $7.16 \pm 0.15$ | $7.23 \pm 0.02$ |

**Fig. S1.** The CD spectra of DNA probe **1** (50% TAT) on different pH conditions: (a)

4  $\mu\text{M}$  DNA probe, pH 5.0; (b) 4  $\mu\text{M}$  DNA probe, pH 9.0.

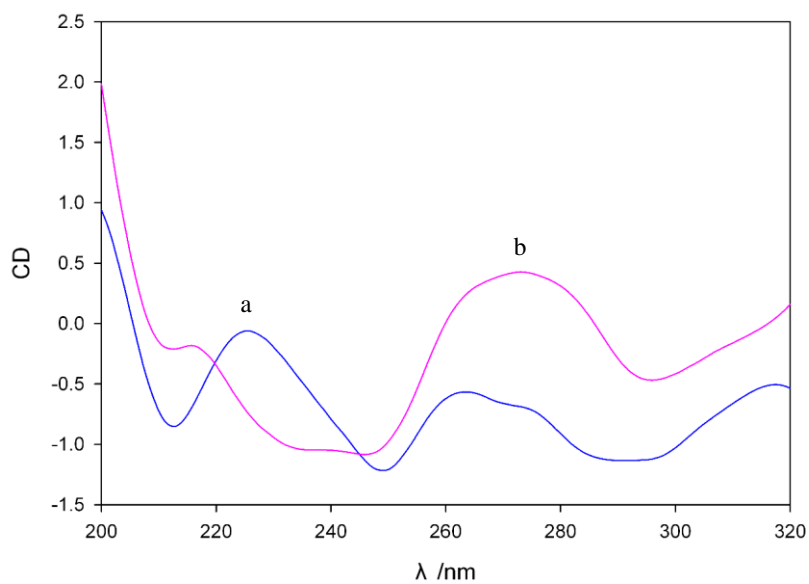

**Fig. S2.** The fluorescence spectra of different fluorescence probes after adding GO: (a) 100 nM triplex DNA probe **1** + 12  $\mu\text{g}/\text{mL}$  GO, pH 5.0; (b) 100 nM control DNA probe **1** + 12  $\mu\text{g}/\text{mL}$  GO, pH 5.0; (c) 100 nM control DNA probe **2** + 12  $\mu\text{g}/\text{mL}$  GO, pH 5.0; (d) 100 nM control DNA probe **3** + 12  $\mu\text{g}/\text{mL}$  GO, pH 5.0.

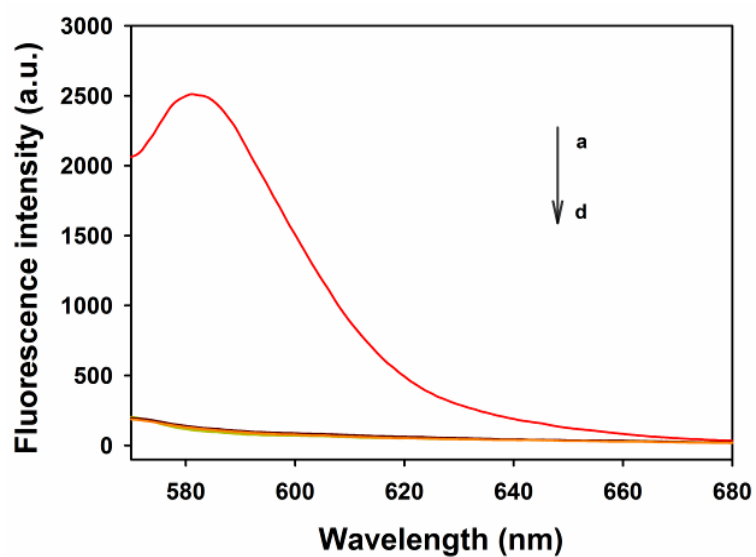

**Fig. S3.** The ratio of fluorescence signal of the DNA probe **1** in different concentrations of GO.  $F$  and  $F_0$  were the fluorescence values at pH 5.0 and 9.0, respectively. Error bars were standard deviations of three repetitive experiments.

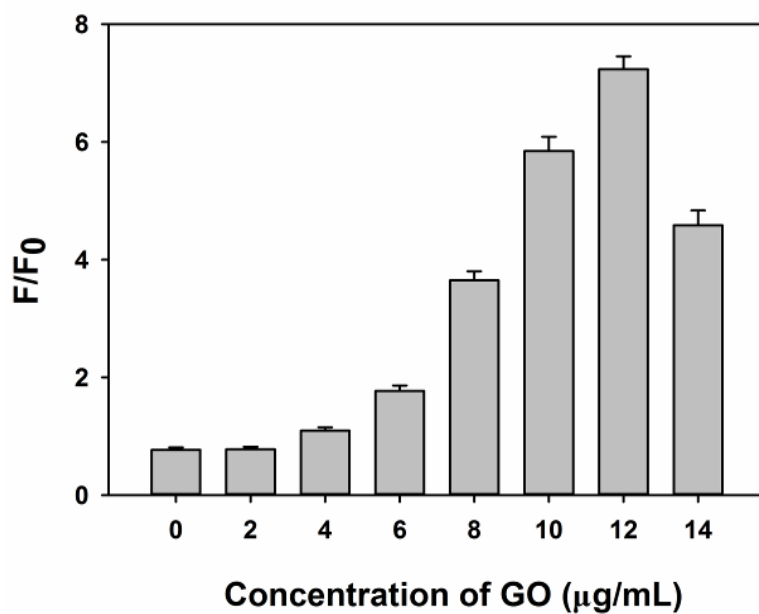

**Fig. S4.** The fluorescence quenching rate of GO (50% TAT): (a) 100 nM DNA + 12  $\mu\text{g/mL}$  GO, pH 5.0; (b) 100 nM DNA + 12  $\mu\text{g/mL}$  GO, pH 6.0; (c) 100 nM DNA + 12  $\mu\text{g/mL}$  GO, pH 7.0; (d) 100 nM DNA + 12  $\mu\text{g/mL}$  GO, pH 8.0; (e) 100 nM DNA + 12  $\mu\text{g/mL}$  GO, pH 9.0.

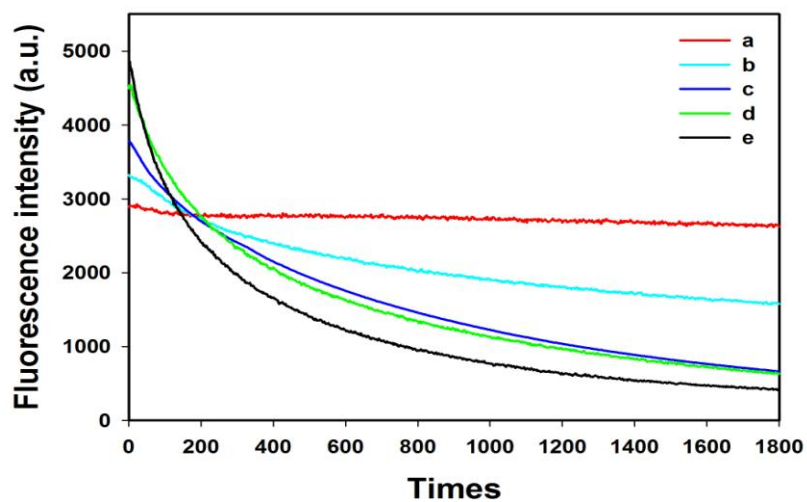

Supplement: c6ay01358a1.pdf [file c6ay01358a1.pdf]
